# Supplementary material for: Nongrowing Season CO2 Emissions Determine the Distinct Carbon Budgets of Two Alpine Wetlands on the Northeastern Qinghai—Tibet Plateau
Source: MDPI journal article supplement (doi:10.3390/atmos12121695), 2021-12-17
Supplement: s1 [file s1]

# Supplementary Materials: Nongrowing Season CO<sub>2</sub> Emissions Determine the Distinct Carbon Budgets of Two Alpine Wetlands on the Northeastern Qinghai–Tibet Plateau <sup>†</sup>

Chenggang Song <sup>1,2,3,†</sup>, Fanglin Luo <sup>4,5,†</sup>, Lele Zhang <sup>1</sup>, Lubei Yi <sup>6</sup>, Chunyu Wang <sup>4,5</sup>, Yongsheng Yang <sup>4,5</sup>, Jiexia Li <sup>4,5</sup>, Kelong Chen <sup>1,\*</sup>, Wenying Wang <sup>2,5,\*</sup>, Yingnian Li <sup>4,5</sup> and Fawei Zhang <sup>4,5,\*</sup>

**Table S1.** The analysis of variance from the general linear model of monthly net ecosystem exchange (ln (NEE) with soil temperature ( $T_s$ , continuous variable) and site attributes (Site, categorical variable) during the nongrowing season.

| Dependant | Factors                  | df | Mean squares | P value     | R <sup>2</sup> |
|-----------|--------------------------|----|--------------|-------------|----------------|
| Ln(NEE)   | $T_s$                    | 1  | 1.02         | $P < 0.001$ | 0.80           |
|           | Site                     | 1  | 2.64         | $P < 0.001$ |                |
|           | $T_s \times \text{Site}$ | 1  | 0.0005       | $P = 0.91$  |                |
|           | Error                    | 20 | 0.039        |             |                |

**Table S2.** The Pearson correlation analysis between annual CO<sub>2</sub> fluxes (NEE, RES, GPP) with environmental controls ( $T_a$ : air temperature; Vapor: atmospheric water vapor; Rain: precipitation;  $R_n$ : net radiation;  $T_s$ : topsoil temperature;  $EVI_{\text{sum}}$ : accumulative enhanced vegetation index).

|                    | NEE           | RES          | GPP   | $T_a$          | Vapor         | Rain  | $R_n$         | $T_s$ | $EVI_{\text{sum}}$ |
|--------------------|---------------|--------------|-------|----------------|---------------|-------|---------------|-------|--------------------|
| NEE                | 1             | <b>.984*</b> | .866  | <b>-.952*</b>  | -.719         | .770  | .826          | .081  | <b>.960*</b>       |
| RES                | <b>.984*</b>  | 1            | .941  | -.911          | -.610         | .775  | .724          | .069  | .940               |
| GPP                | .866          | .941         | 1     | -.751          | -.345         | .716  | .464          | .040  | .818               |
| $T_a$              | <b>-.952*</b> | -.911        | -.751 | 1              | .878          | -.889 | -.929         | -.355 | <b>-.993**</b>     |
| Vapor              | -.719         | -.610        | -.345 | .878           | 1             | -.764 | <b>-.980*</b> | -.511 | -.822              |
| Rain               | .770          | .775         | .716  | -.889          | -.764         | 1     | .749          | .684  | .912               |
| $R_n$              | .826          | .724         | .464  | -.929          | <b>-.980*</b> | .749  | 1             | .356  | .878               |
| $T_s$              | .081          | .069         | .040  | -.355          | -.511         | .684  | .356          | 1     | .357               |
| $EVI_{\text{sum}}$ | <b>.960*</b>  | .940         | .818  | <b>-.993**</b> | -.822         | .912  | .878          | .357  | 1                  |

Note: \*\* and \*: Correlation is significant at the 0.01 and 0.05 level.

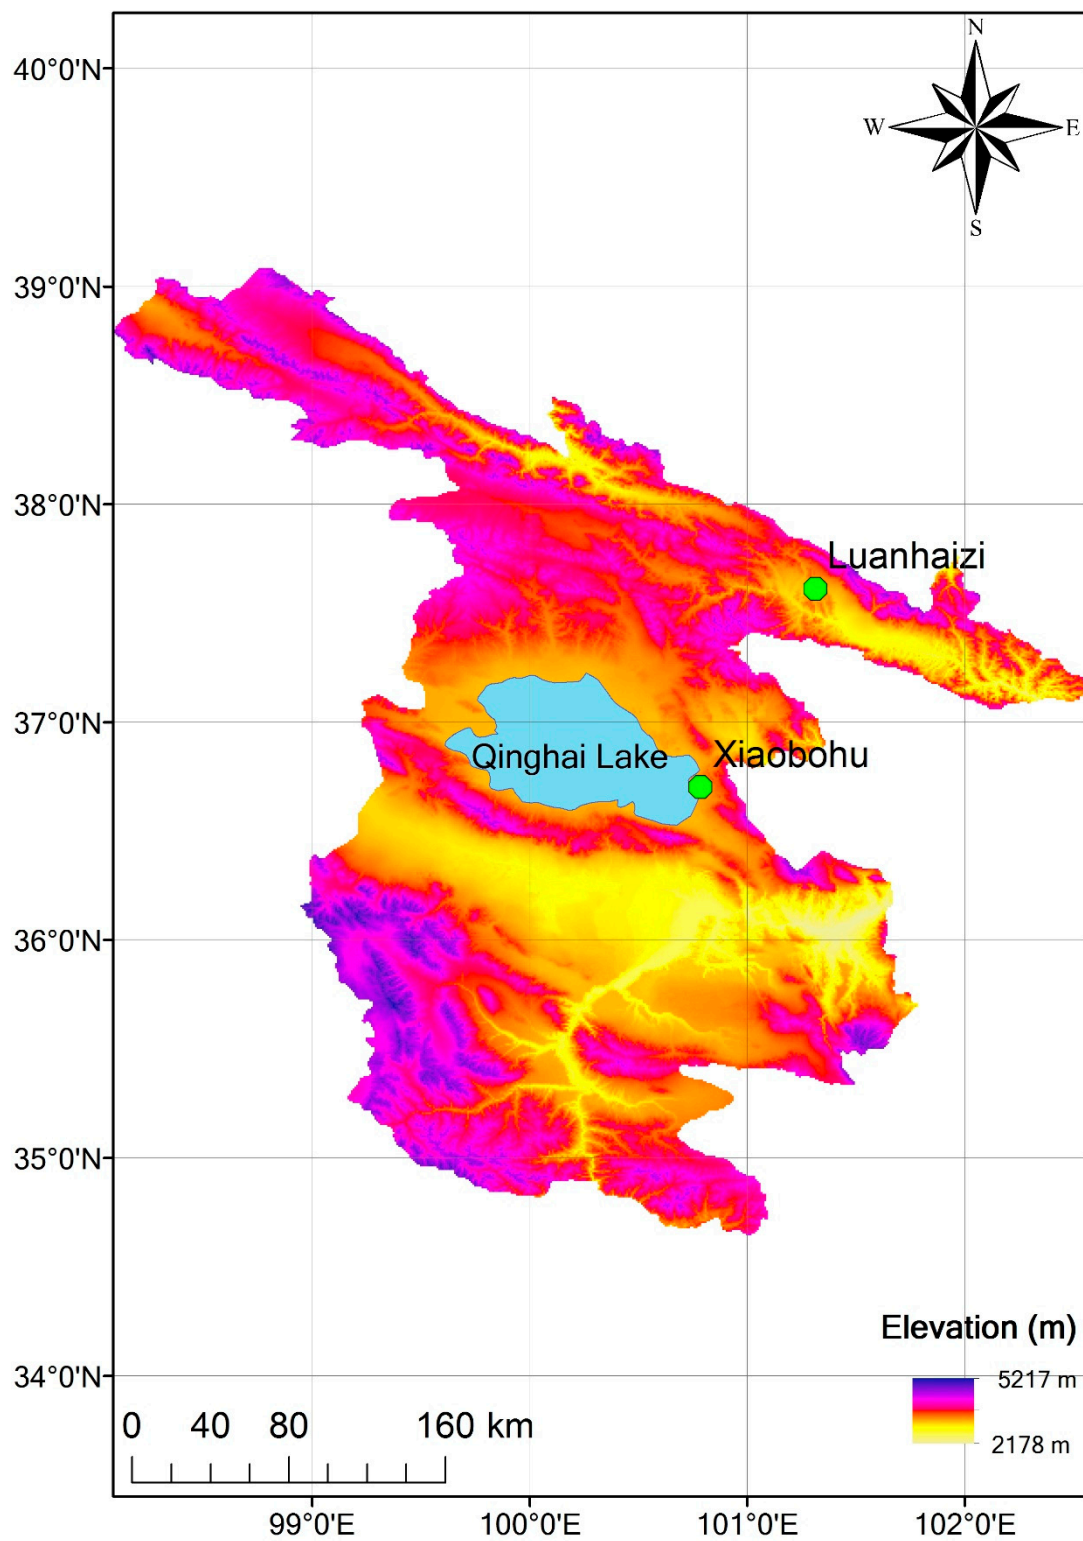

**Figure S1.** The geographic location of the two alpine wetlands.

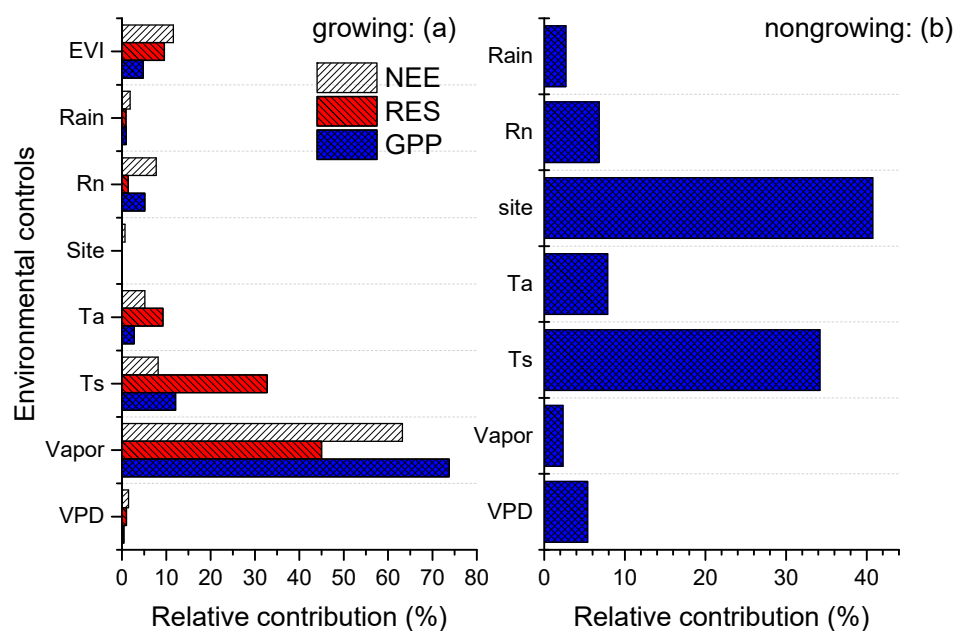

**Figure S2.** The relative contributions of environmental controls on variations of the growing season (a) and the nongrowing season (b) 8-day CO<sub>2</sub> fluxes of the two alpine wetlands.

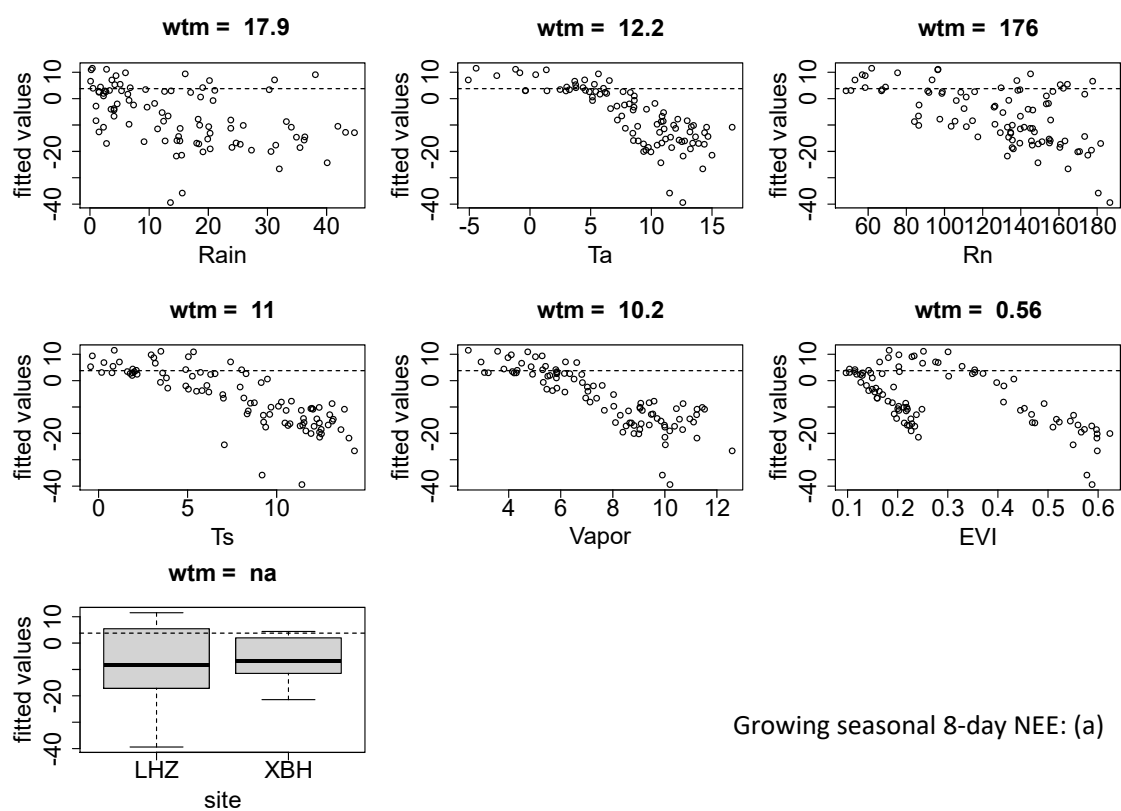

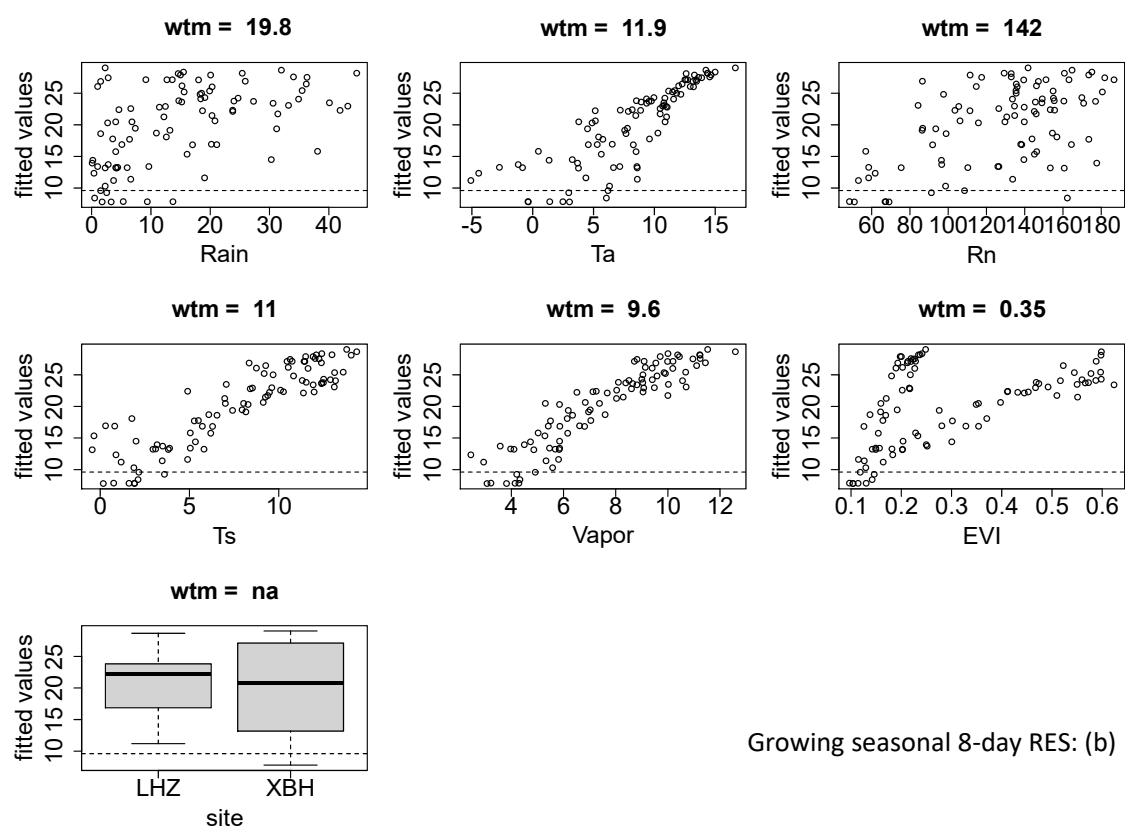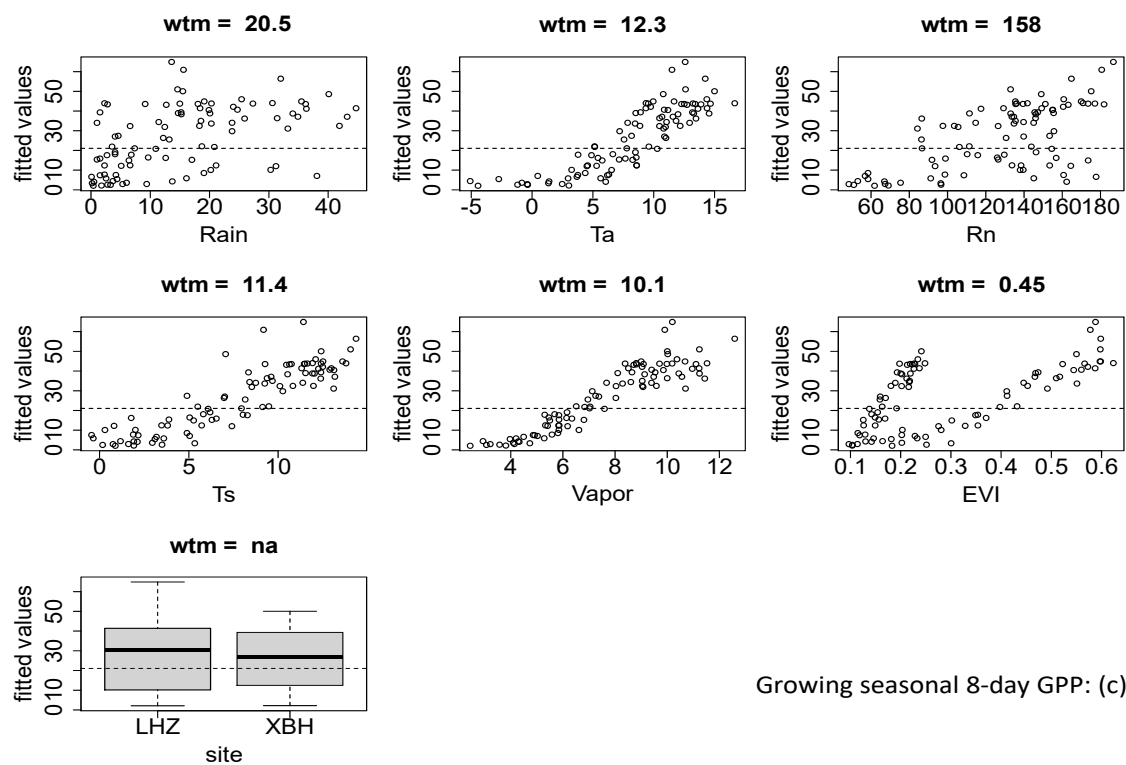

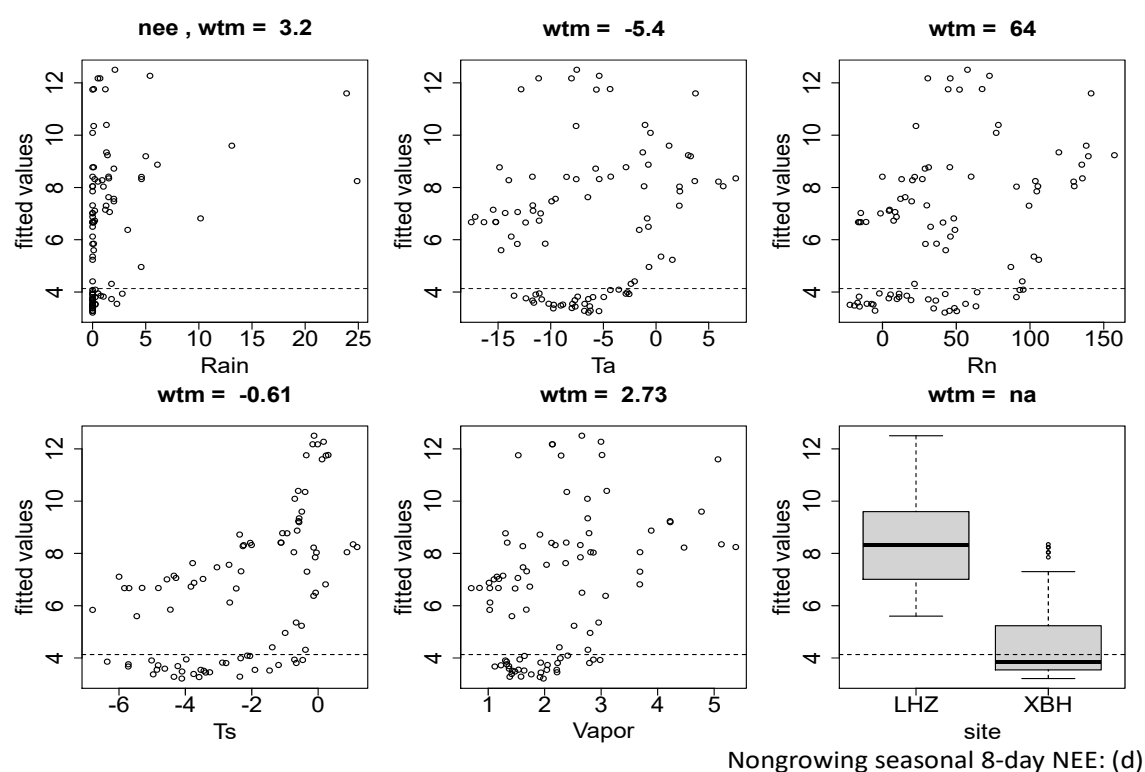

**Figure S3.** The fitted 8-day CO<sub>2</sub> fluxes (NEE: (a, d); RES (b); GPP (c)) in relation to each of the predictors (Rain: precipitation; Ta: air temperature; Rn: net radiation; Vapor: atmospheric water vapor; Ts: topsoil temperature; EVI: enhanced vegetation index; Site: categorical variable, LHZ and XBH) used in the model during the growing season (a, b, c) and nongrowing season (d).

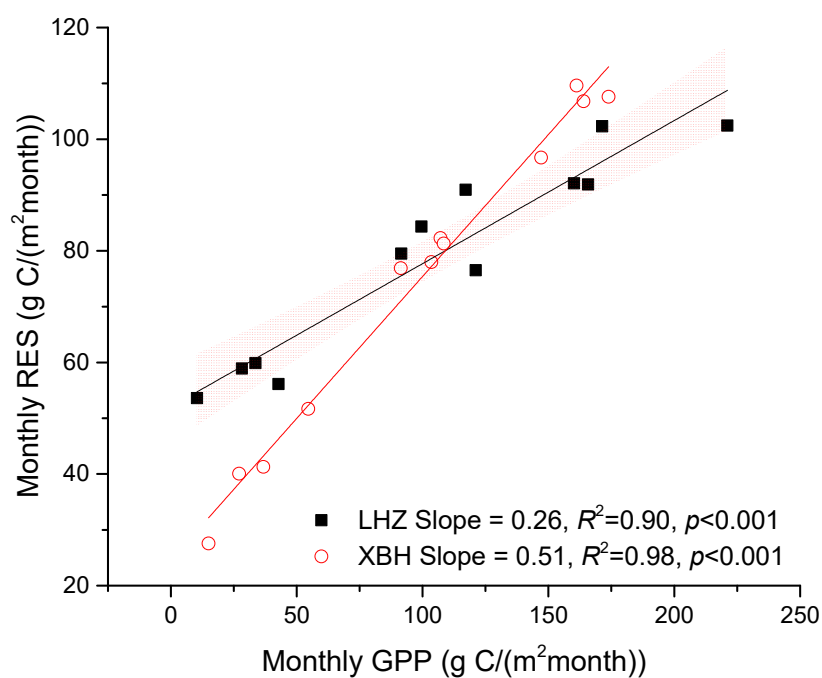

**Figure S4.** The relationship between monthly ecosystem respiration (RES) and monthly gross primary productivity (GPP) during the growing season of the two alpine wetlands (LHZ: Luanhaizi and XBH: Xiaobohu). The shading areas are 95% confidence intervals.

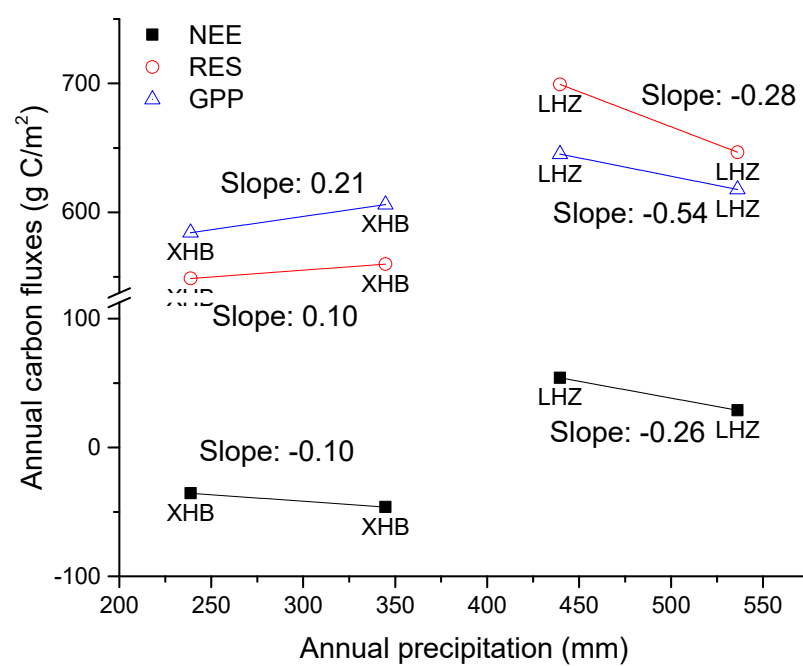

**Figure S5.** The relationships of annual carbon fluxes and annual precipitation of the two alpine wetland sites (Xiaobohu: XBH and Luanhaizi: LHZ).
